# Supplementary material for: Discrimination and highly selective adsorption of phosphoproteins and glycoproteins with arginine-functionalized polyhedral oligomeric silsesquioxane frameworks
Source: Royal Society of Chemistry journal article supplement (doi:10.1039/c8tb01031e), 2018-01-01
Supplement: c8tb01031e1.pdf [file c8tb01031e1.pdf]

## Electronic Supplementary Information

### **Discrimination and highly selective adsorption of phosphoprotein and glycoprotein with arginine functionalized polyhedral oligomeric silsesquioxane framework**

*Yue Zhang, Meng-Meng Wang, Jun-Xia Hao, Xu-Wei Chen\* and Jian-Hua Wang\**

*Research Center for Analytical Sciences, Department of Chemistry, College of Sciences,  
Northeastern University, Box 332, Shenyang 110819, China*

Corresponding authors' E-mail: [chenxuwei@mail.neu.edu.cn](mailto:chenxuwei@mail.neu.edu.cn) (X.W. Chen),

[jianhuajrz@mail.neu.edu.cn](mailto:jianhuajrz@mail.neu.edu.cn) (J.H. Wang).

Tel: +86 24 83688944; Fax: +86 24 83687659

Table S1. XPS atomic data analysis of the PP-1 and PP-1-Arg framework.

|          | Si 2p | N 1s  | O 1s   | C1s    |
|----------|-------|-------|--------|--------|
| PP-1     | 7.3%  | 6.46% | 29.09% | 57.16% |
| PP-1-Arg | 7.05% | 9.43% | 25.62% | 57.9%  |

Table S2. Relative content of different nitrogenous groups in the PP-1 and PP-1-Arg framework.

|          | C=N  | C-N   | -N-H  |
|----------|------|-------|-------|
| PP-1     | 0    | 72.6% | 27.4% |
| PP-1-Arg | 7.9% | 75.4% | 17.4% |

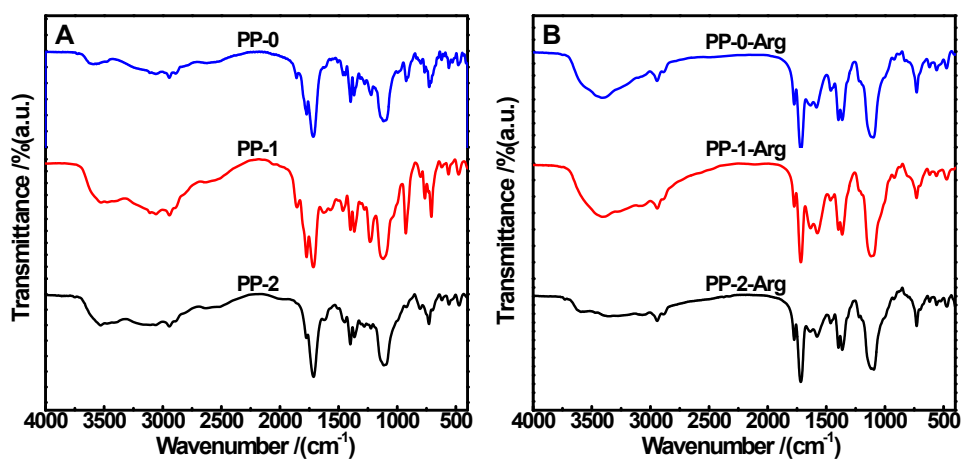

**Fig. S1** (A) FT-IR spectra of PP-0, PP-1 and PP-2. (B) FT-IR spectra of PP-0-Arg, PP-1-Arg and PP-2-Arg.

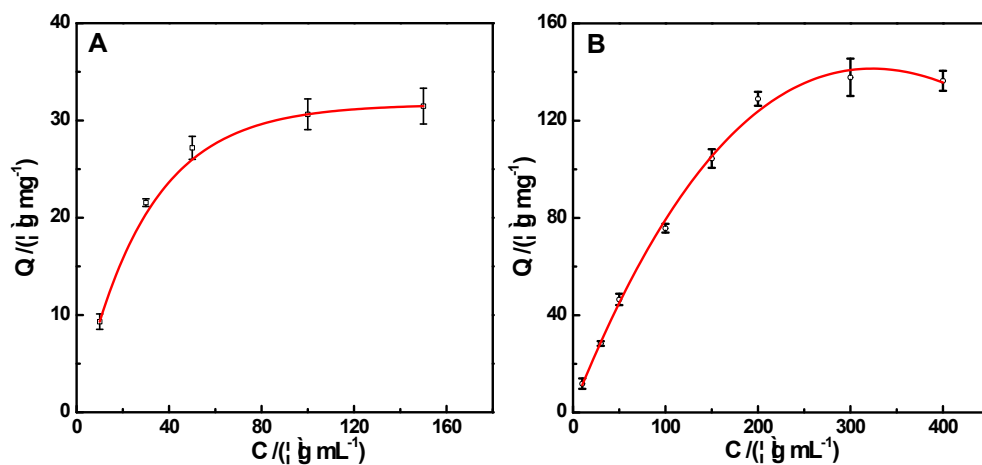

**Fig. S2** The adsorption isotherm of  $\beta$ -ca (A) and bLF (B) on the PP-1-Arg framework at pH 1 and pH 7, respectively. Protein solution: 10-450  $\mu\text{g mL}^{-1}$ , 1.0 mL; Amount of the adsorbent: 0.1 mg; Adsorption time: 30 min.

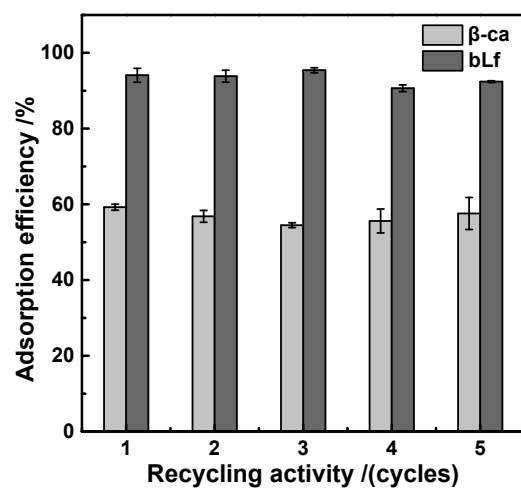

**Fig. S3** Effect of recycling number on the adsorption of  $\beta$ -ca and bLf by the PP-1-Arg framework.
